# Supplementary material
Source: PubMed Central journal article supplement (PMC4912897)
Supplement: NIHMS783164-supplement.pdf [file NIHMS783164-supplement.pdf]

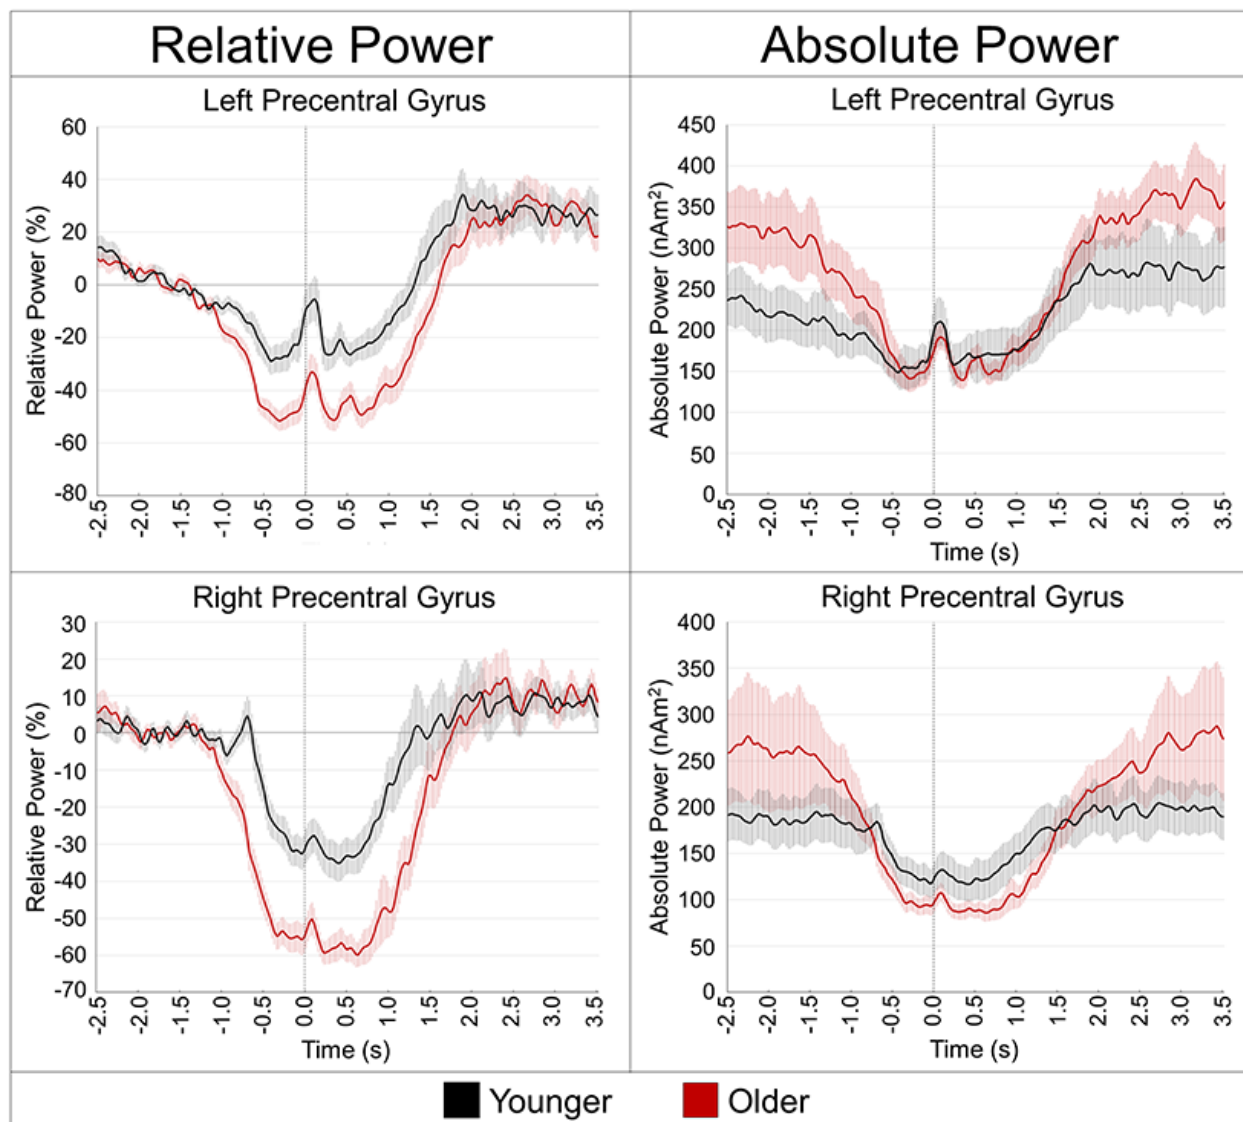

**Figure S1. Absolute and relative temporal evolution of the alpha ERD response.** Voxel time series were extracted from the peak voxels of the left precentral gyrus (top panel) and right precentral gyrus (bottom panel) to more precisely examine the dynamics of the alpha ERD in younger (black line) and older adults (red line). Time (in s, movement onset = 0.0 s) is denoted on the x-axis, while power is shown on the y-axis. The left panel shows each response as percentage relative to baseline (-1.8 to -1.2 s), while the right panel shows the absolute power (in  $\text{nAm}^2$ ). The shaded area around each line denotes the standard error of the mean (SEM).
